# Supplementary material for: A MEMS methanol reformer heated by decomposition of hydrogen peroxide
Source: Royal Society of Chemistry journal article supplement (doi:10.1039/b700040e), 2007-01-01
Supplement: b700040e.pdf [file b700040e.pdf]

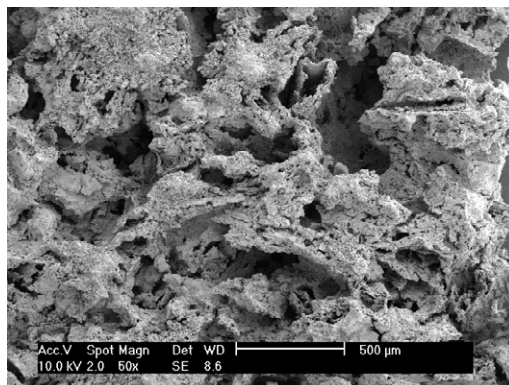

**Fig. S1** SEM image of a porous catalyst support (ISOLITE<sup>®</sup>). This material is composed of 40% Al<sub>2</sub>O<sub>3</sub> and 55% SiO<sub>2</sub> with traces of the other metal oxides, and the porosity is approximately 71%. The scale of the bulk pores was between 100 and 300 µm, while smaller scale pores were a few microns.

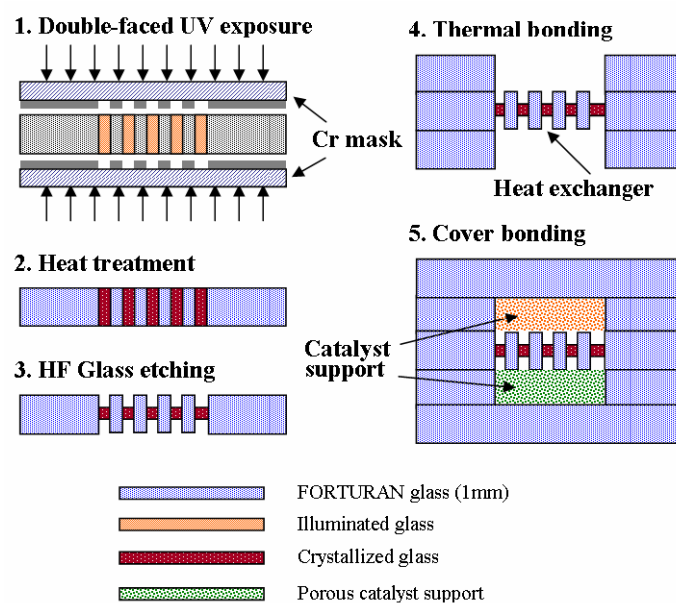

**Fig. S2** Overall fabrication procedure of the methanol steam reformer. The fabrication process consists of UV exposure, heat treatment, HF etching, catalyst insertion, and fusion-bonding.

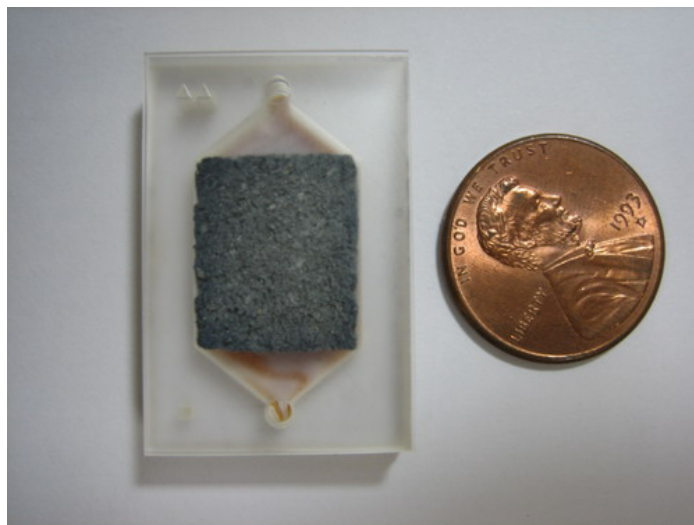

**Fig. S3** The complete reformer system that is constructed by fusion-bonding the fabricated glass layers. The best fusion-bonding between glass wafers was obtained by pressing the wafers against each other at  $1000 \text{ N/m}^2$  in a furnace held at  $500 \text{ }^\circ\text{C}$ .

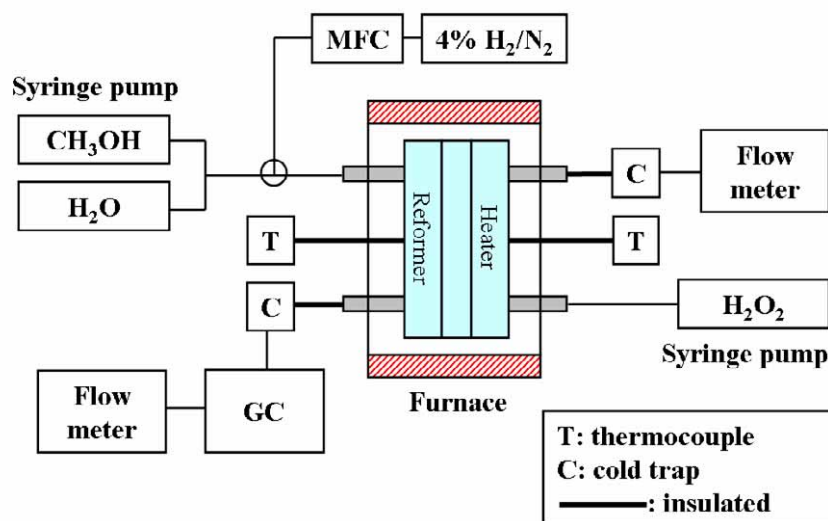

**Fig. S4** Experimental setup for testing of the methanol steam reformer. The setup consists of two syringe pumps, two thermocouples, furnace, flow meter, and gas chromatography.
